# Supplementary material for: From Y6 to BTPT-4F: a theoretical insight into the influence of the individual change of fused-ring skeleton length or side alkyl chains on molecular arrangements and electron mobility
Source: Royal Society of Chemistry journal article supplement (doi:10.1039/d1nj01515j), 2021-01-01
Supplement: d1nj01515j1.pdf [file d1nj01515j1.pdf]

## Supporting Information:

# From Y6 to BTPT-4F: a theoretical insight into the influence of the individual change of fused-ring skeleton length or side alkyl chains on molecular arrangements and electron mobility

Jie Zhang, Yunjie Xiang\* and Shaohui Zheng\*

School of Materials and Energy

Chongqing Key Laboratory for Advanced Materials and Technologies of Clean Energies

Southwest University, Chongqing, China

Corresponding author: [hao1986kx88@swu.edu.cn](mailto:hao1986kx88@swu.edu.cn), [shaohuizheng@swu.edu.cn](mailto:shaohuizheng@swu.edu.cn)

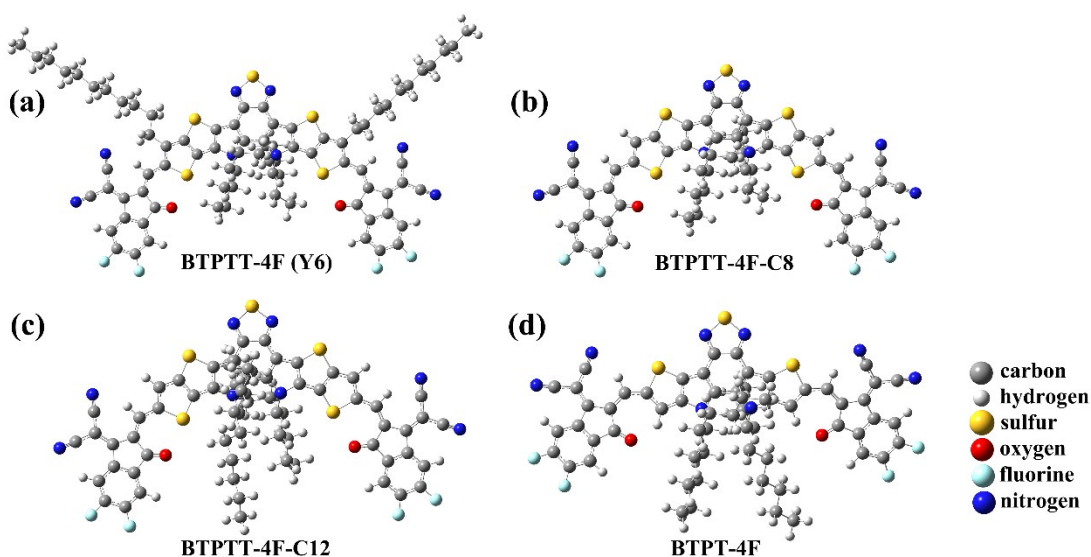

Figure S1. Optimized structures of (a) BTPTT-4F (Y6), (b) BTPTT-4F-C8, (c) BTPTT-4F-C12, and (d) BTPT-4F. Color of codes: grey-carbon, white-hydrogen, yellow-sulfur, red-oxygen, light blue-fluorine and blue-nitrogen.

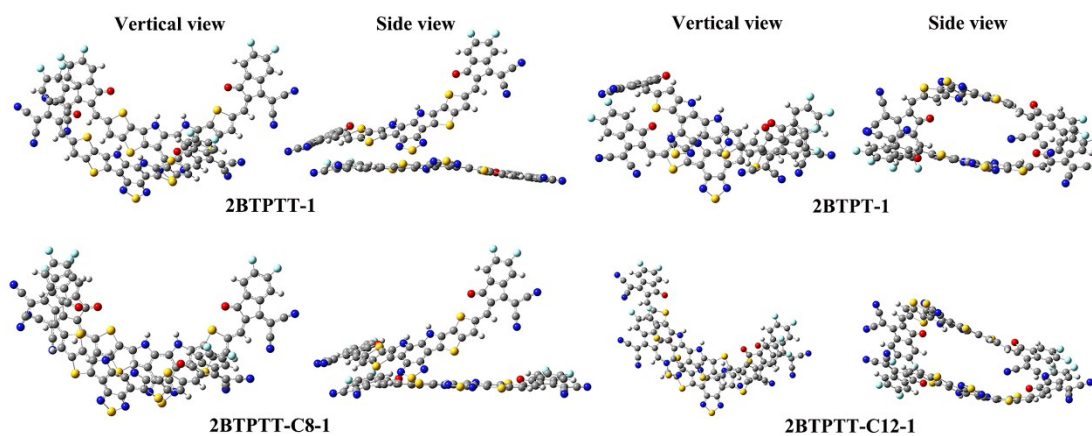

Figure S2. Optimized dimer configurations with bimolecular parallel. The alkyl side chains are omitted for clarity.

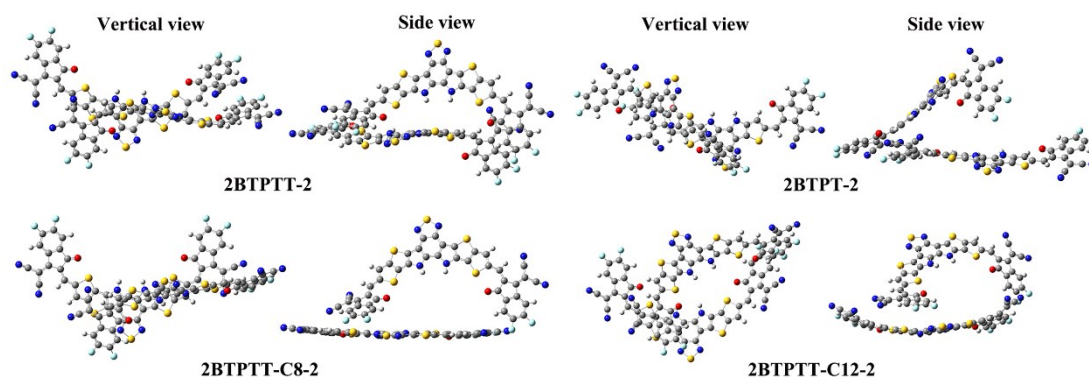

Figure S3. Optimized dimer configurations with bimolecular anti-parallel. The alkyl side chains are omitted for clarity.

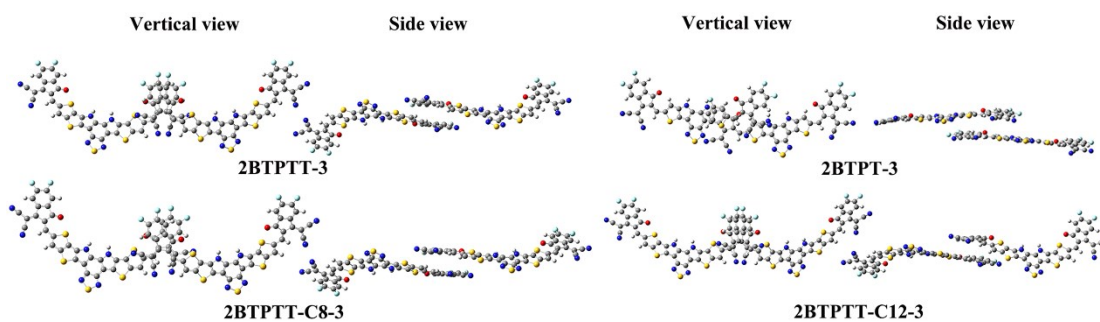

Figure S4. Optimized dimer configurations with end-group overlap. The alkyl side chains are omitted for clarity.

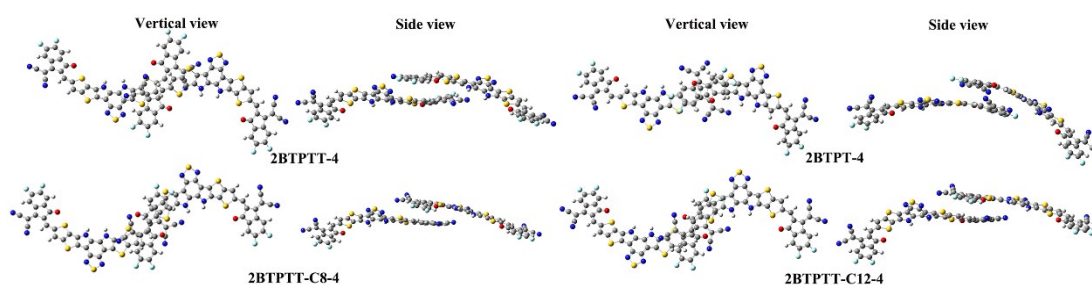

Figure S5. Optimized dimer configurations with end-group anti-overlap. The alkyl side chains are omitted for clarity.

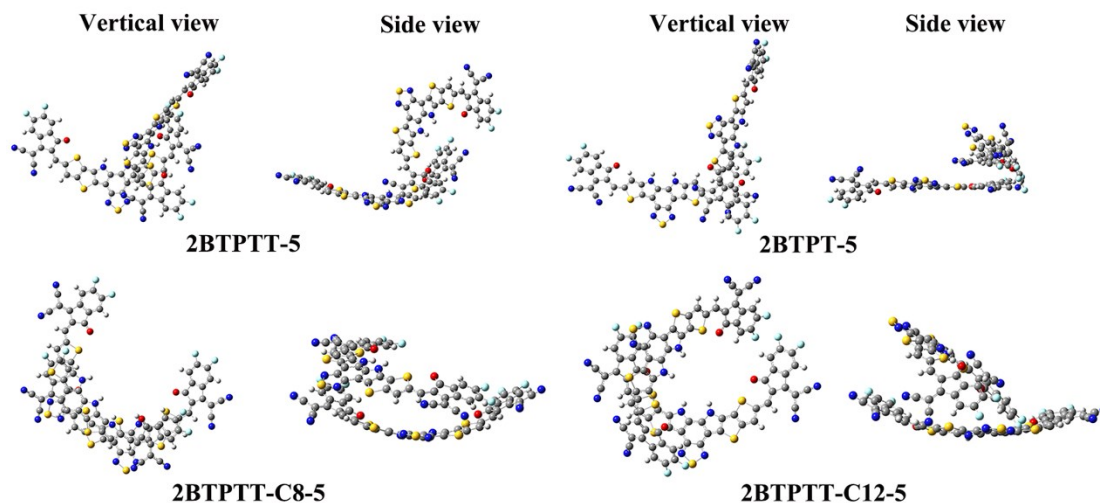

Figure S6. Optimized dimer configurations with bimolecular vertical and central sulfur atom pointing left. The alkyl side chains are omitted for clarity.

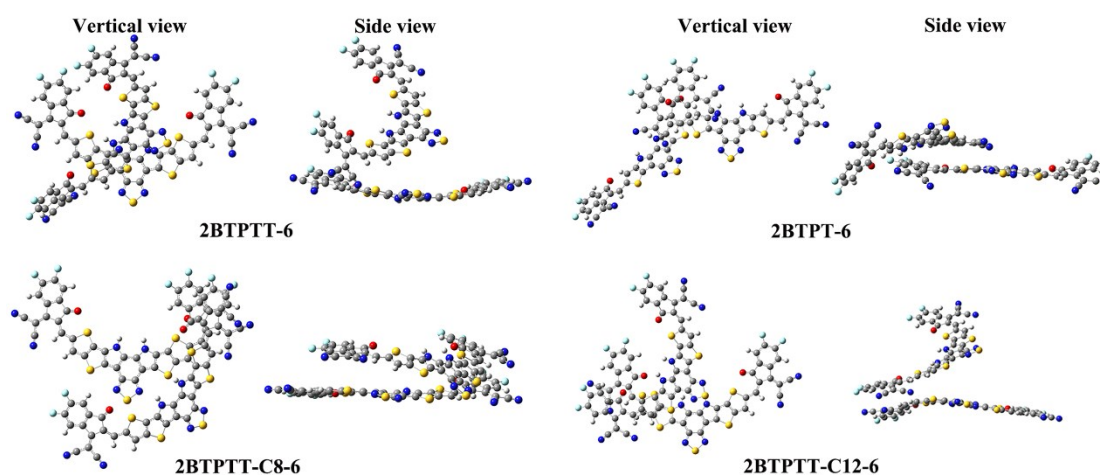

Figure S7. Optimized dimer configurations with bimolecular vertical and central sulfur atom pointing right. The alkyl side chains are omitted for clarity.

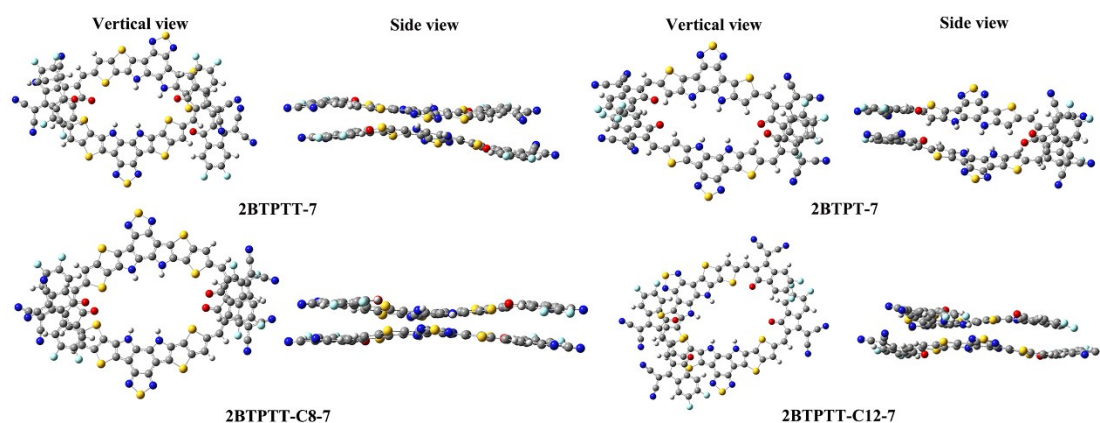

Figure S8. Optimized dimer configurations with tail to tail overlap. The alkyl side chains are omitted for clarity.

Table S1. Dihedral angles of BTPTT-4F ( $\alpha_1$ ,  $\beta_1$  and  $\gamma_1$ ), BTPTT-4F-C8 ( $\alpha_2$ ,  $\beta_2$  and  $\gamma_2$ ), BTPTT-4F-

C12 ( $\alpha_3, \beta_3$  and  $\gamma_3$ ), and BTPT-4F ( $\alpha_4, \beta_4$  and  $\gamma_4$ ). Unit: degree.

| System       | $\alpha_1$ | $\beta_1$ | Average( $\alpha_1, \beta_1$ ) | $\gamma_1$ |
|--------------|------------|-----------|--------------------------------|------------|
| BTPTT-4F(Y6) | 1.27       | 0.22      | 0.75                           | 11.15      |
| 2BTPTT-1     | 1.07       | 6.36      | 3.72                           | 7.63       |
|              | 1.81       | 11.28     | 6.55                           | 16.29      |
| 2BTPTT-2     | 19.87      | 8.24      | 14.06                          | 21.41      |
|              | 6.55       | 23.96     | 15.26                          | 23.87      |
| 2BTPTT-3     | 8.14       | 0.88      | 4.51                           | 11.67      |
|              | 8.95       | 1.04      | 5.00                           | 12.09      |
| 2BTPTT-4     | 4.64       | 0.69      | 2.67                           | 15.01      |
|              | 0.42       | 5.78      | 3.10                           | 8.45       |
| 2BTPTT-5     | 16.33      | 1.33      | 8.83                           | 15.86      |
|              | 0.45       | 10.81     | 5.63                           | 13.40      |
| 2BTPTT-6     | 11.64      | 2.01      | 6.83                           | 10.16      |
|              | 18.03      | 0.69      | 9.36                           | 8.54       |
| 2BTPTT-7     | 3.73       | 5.83      | 4.78                           | 10.50      |
|              | 1.01       | 12.13     | 6.57                           | 8.08       |

| System      | $\alpha_2$ | $\beta_2$ | Average( $\alpha_2, \beta_2$ ) | $\gamma_2$ |
|-------------|------------|-----------|--------------------------------|------------|
| BTPTT-4F-C8 | 0.27       | 0.05      | 0.16                           | 11.43      |
| 2BTPTT-C8-1 | 3.15       | 2.17      | 2.66                           | 7.84       |
|             | 4.31       | 8.13      | 6.22                           | 16.72      |
| 2BTPTT-C8-2 | 13.73      | 1.39      | 7.56                           | 12.65      |
|             | 0.18       | 2.25      | 1.22                           | 6.33       |
| 2BTPTT-C8-3 | 9.88       | 1.22      | 5.55                           | 11.19      |
|             | 8.49       | 0.81      | 4.65                           | 10.87      |
| 2BTPTT-C8-4 | 6.50       | 0.27      | 3.39                           | 13.26      |
|             | 3.78       | 0.56      | 2.17                           | 10.16      |
| 2BTPTT-C8-5 | 9.97       | 2.36      | 6.17                           | 14.46      |
|             | 8.78       | 5.42      | 7.10                           | 10.69      |
| 2BTPTT-C8-6 | 10.03      | 10.94     | 10.49                          | 10.10      |
|             | 0.79       | 0.29      | 0.54                           | 12.19      |
| 2BTPTT-C8-7 | 1.16       | 3.09      | 2.13                           | 9.35       |
|             | 7.08       | 1.31      | 4.20                           | 8.69       |

| System       | $\alpha_3$ | $\beta_3$ | Average( $\alpha_3, \beta_3$ ) | $\gamma_3$ |
|--------------|------------|-----------|--------------------------------|------------|
| BTPTT-4F-C12 | 0.03       | 0.47      | 0.25                           | 11.66      |
| 2BTPTT-C12-1 | 10.26      | 5.11      | 7.69                           | 15.63      |
|              | 6.26       | 10.54     | 8.40                           | 13.54      |
| 2BTPTT-C12-2 | 5.48       | 12.19     | 8.84                           | 11.85      |
|              | 4.72       | 1.29      | 3.01                           | 0.18       |
| 2BTPTT-C12-3 | 15.55      | 0.53      | 8.04                           | 12.12      |
|              | 4.63       | 1.44      | 3.04                           | 11.59      |

|              |       |      |      |       |
|--------------|-------|------|------|-------|
| 2BTPTT-C12-4 | 8.09  | 1.86 | 4.98 | 12.82 |
|              | 0.05  | 0.23 | 0.14 | 12.76 |
| 2BTPTT-C12-5 | 13.44 | 2.46 | 7.95 | 9.27  |
|              | 5.85  | 1.74 | 3.80 | 12.80 |
| 2BTPTT-C12-6 | 5.88  | 0.17 | 3.03 | 12.17 |
|              | 0.79  | 1.20 | 1.00 | 9.66  |
| 2BTPTT-C12-7 | 7.19  | 5.22 | 6.21 | 7.57  |
|              | 3.68  | 2.93 | 3.31 | 5.91  |

---

| System  | $\alpha_4$ | $\beta_4$ | Average( $\alpha_4, \beta_4$ ) | $\gamma_4$ |
|---------|------------|-----------|--------------------------------|------------|
| BTPT-4F | 5.22       | 2.63      | 3.93                           | 11.38      |
| 2BTPT-1 | 33.69      | 0.92      | 17.31                          | 11.90      |
|         | 5.79       | 10.44     | 8.12                           | 12.14      |
| 2BTPT-2 | 4.32       | 4.50      | 4.41                           | 9.60       |
|         | 22.00      | 13.06     | 17.53                          | 12.82      |
| 2BTPT-3 | 3.85       | 2.20      | 3.03                           | 5.85       |
|         | 0.63       | 4.99      | 2.81                           | 4.51       |
| 2BTPT-4 | 4.47       | 10.56     | 7.52                           | 9.61       |
|         | 4.76       | 6.11      | 5.44                           | 10.87      |
| 2BTPT-5 | 5.05       | 2.79      | 3.92                           | 11.35      |
|         | 11.31      | 8.30      | 9.81                           | 14.04      |
| 2BTPT-6 | 7.40       | 6.35      | 6.88                           | 12.27      |
|         | 4.68       | 3.03      | 3.86                           | 10.54      |
| 2BTPT-7 | 9.21       | 18.03     | 13.62                          | 10.25      |
|         | 9.29       | 18.61     | 13.95                          | 12.32      |

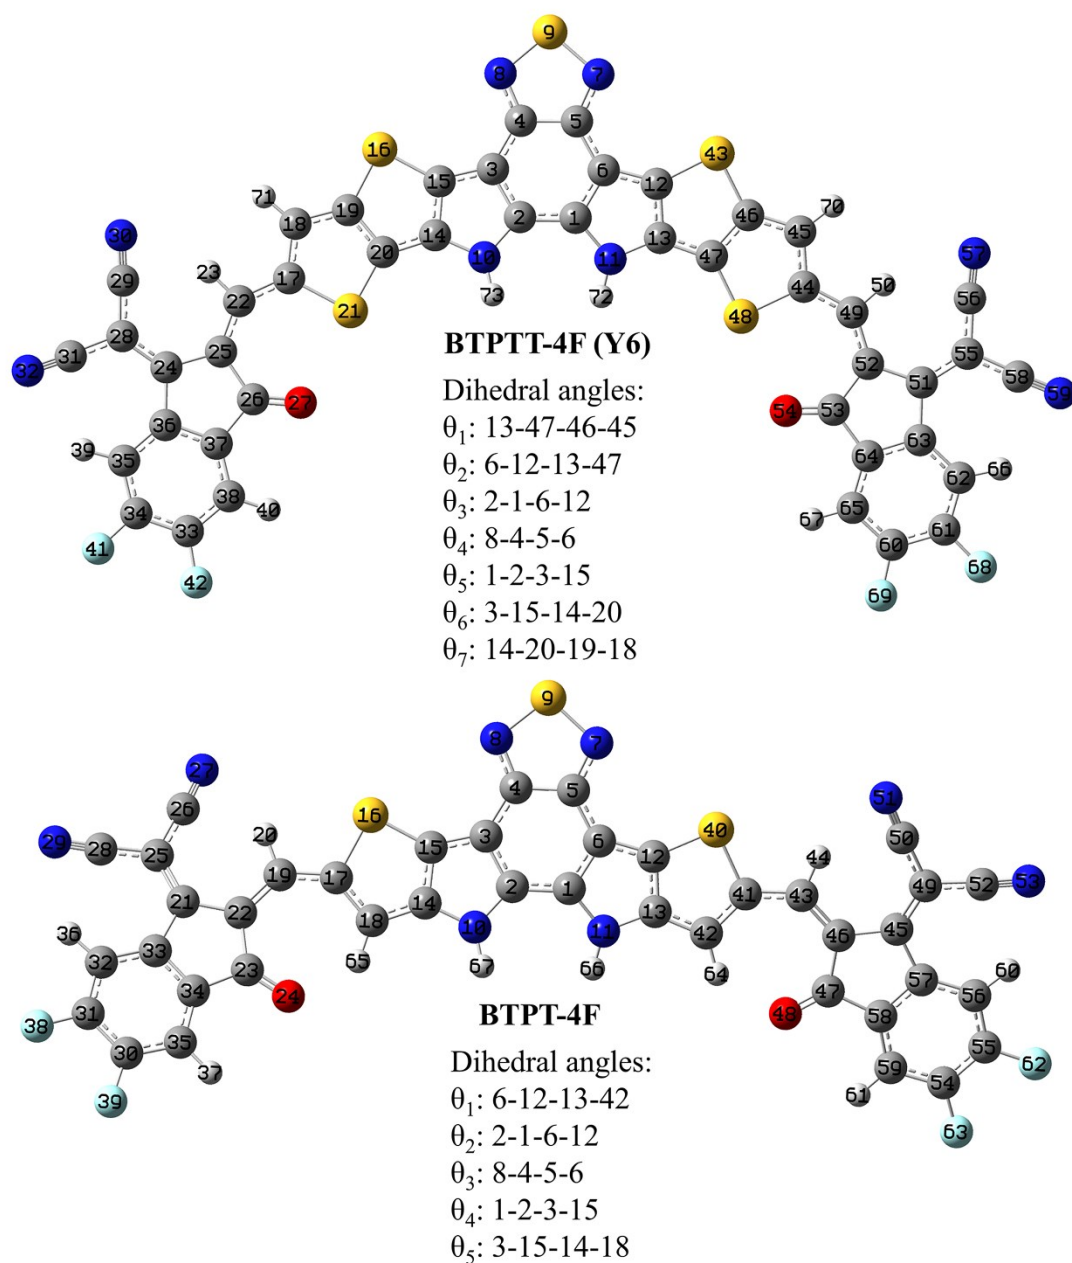

Figure S9. Illustration of selected dihedral angles of central fused-ring skeleton of BTPTT-4F ( $\theta_1$ - $\theta_7$ ) and BTPT-4F ( $\theta_1$ - $\theta_5$ ). Color of codes: grey-carbon, white-hydrogen, yellow-sulfur, red-oxygen, light blue-fluorine and blue-nitrogen. The side alkyl side chains are omitted for clarity.

Table S2. Dihedral angles of central fused-ring skeleton of BTPTT-4F ( $\theta_1$ - $\theta_7$ ) and BTPT-4F ( $\theta_1$ - $\theta_5$ ). Unit: degree.

| System   | $\theta_1$ | $\theta_2$ | $\theta_3$ | $\theta_4$ | $\theta_5$ | $\theta_6$ | $\theta_7$ |
|----------|------------|------------|------------|------------|------------|------------|------------|
| BTPTT-4F | 0.66       | 0.58       | 5.31       | 3.41       | 4.30       | 0.16       | 0.11       |
| 2BTPTT-1 | 0.36       | 2.45       | 0.11       | 3.06       | 8.67       | 1.55       | 2.57       |
| 2BTPTT-2 | 1.06       | 1.53       | 5.08       | 2.97       | 6.90       | 3.14       | 4.94       |
| 2BTPTT-3 | 3.79       | 4.81       | 3.22       | 5.07       | 3.95       | 8.50       | 2.41       |
|          | 1.30       | 9.75       | 1.86       | 5.01       | 2.77       | 7.79       | 3.93       |
|          | 0.16       | 2.31       | 3.31       | 3.92       | 4.29       | 1.63       | 0.20       |

|          |      |      |      |      |      |      |      |
|----------|------|------|------|------|------|------|------|
|          | 0.08 | 2.06 | 3.43 | 3.58 | 3.73 | 2.54 | 1.16 |
| 2BTPTT-4 | 0.36 | 2.11 | 5.28 | 2.47 | 1.10 | 7.45 | 4.84 |
|          | 0.56 | 0.30 | 7.64 | 2.18 | 0.24 | 2.00 | 1.17 |
| 2BTPTT-5 | 0.16 | 2.68 | 5.61 | 3.48 | 1.23 | 4.83 | 4.43 |
|          | 9.13 | 8.75 | 0.64 | 5.76 | 3.75 | 0.88 | 1.48 |
| 2BTPTT-6 | 1.23 | 4.89 | 2.64 | 4.58 | 9.26 | 3.05 | 1.34 |
|          | 0.89 | 1.05 | 4.06 | 3.93 | 4.71 | 1.03 | 2.42 |
| 2BTPTT-7 | 2.52 | 1.33 | 6.15 | 2.51 | 1.32 | 1.09 | 0.46 |
|          | 4.73 | 3.75 | 9.01 | 1.52 | 3.25 | 4.14 | 0.19 |

| System  | $\theta_1$ | $\theta_2$ | $\theta_3$ | $\theta_4$ | $\theta_5$ |
|---------|------------|------------|------------|------------|------------|
| BTPT-4F | 0.76       | 5.64       | 3.46       | 4.69       | 1.63       |
| 2BTPT-1 | 3.91       | 9.75       | 1.19       | 0.60       | 7.76       |
|         | 8.17       | 0.05       | 4.93       | 7.35       | 1.84       |
| 2BTPT-2 | 1.78       | 4.62       | 4.12       | 4.21       | 2.24       |
|         | 5.73       | 3.56       | 3.39       | 1.86       | 9.31       |
| 2BTPT-3 | 2.17       | 1.24       | 0.10       | 2.98       | 0.68       |
|         | 2.21       | 1.91       | 1.93       | 2.60       | 3.44       |
| 2BTPT-4 | 3.59       | 6.41       | 3.45       | 4.24       | 3.06       |
|         | 1.27       | 4.73       | 3.85       | 5.46       | 2.65       |
| 2BTPT-5 | 3.55       | 2.23       | 4.16       | 6.02       | 2.61       |
|         | 4.63       | 1.77       | 4.63       | 6.63       | 2.74       |
| 2BTPT-6 | 3.99       | 3.74       | 4.26       | 5.29       | 3.69       |
|         | 3.24       | 0.32       | 4.55       | 8.28       | 1.70       |
| 2BTPT-7 | 7.71       | 0.36       | 5.06       | 9.68       | 0.61       |
|         | 8.22       | 0.82       | 4.96       | 8.38       | 1.33       |

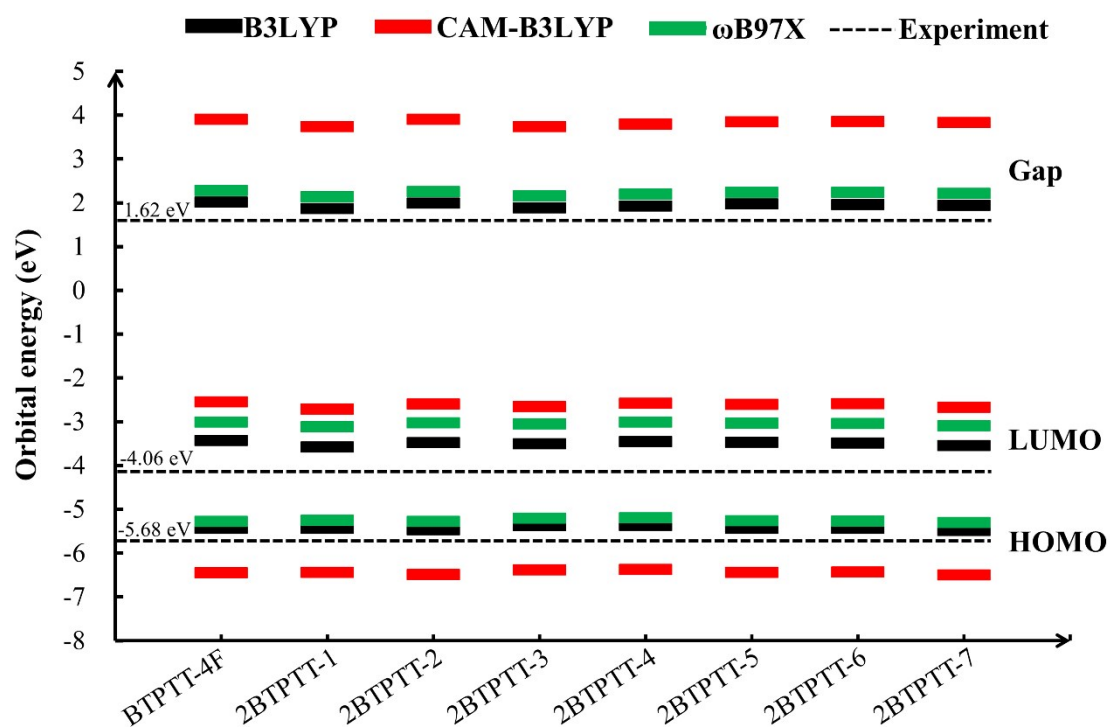

Figure S10. Calculated HOMO, LUMO and corresponding gap energy of BTPTT-4F monomer and dimers obtained with functionals B3LYP, CAM-B3LYP, and tuned  $\omega$ B97X and basis set 6-31G(d) via PCM ( $\epsilon=3.0$ ). The experimental data are from reference 1.<sup>1</sup>

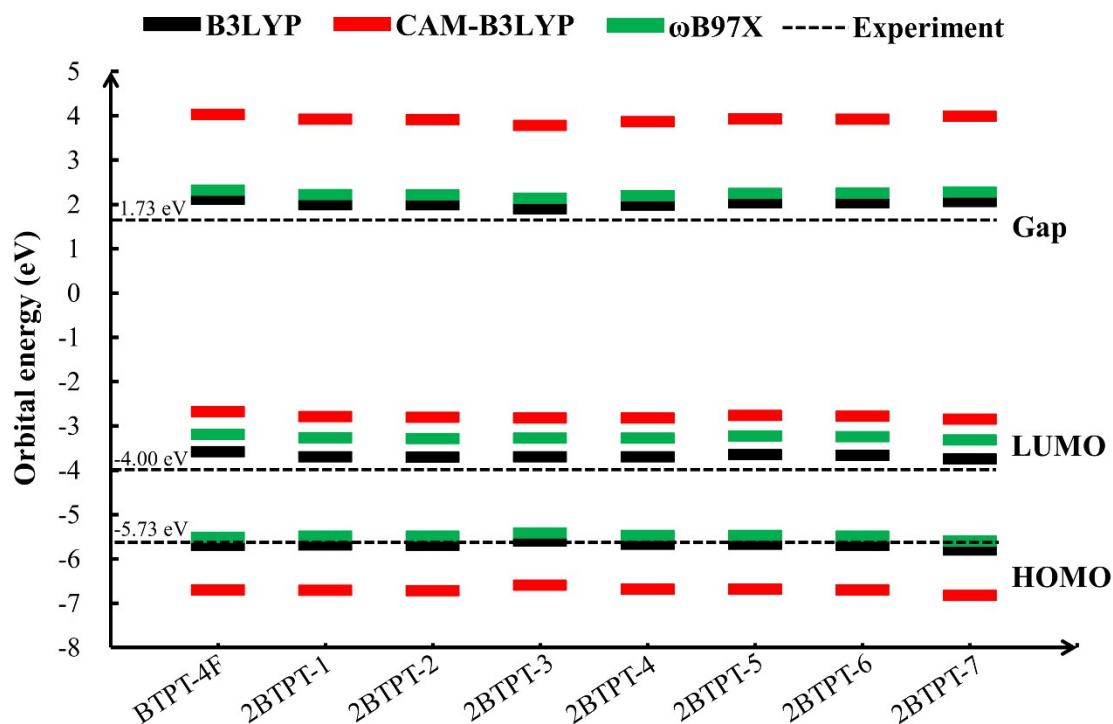

Figure S11. Calculated HOMO, LUMO and corresponding gap energy of BTPT-4F monomer and dimers obtained with functionals B3LYP, CAM-B3LYP, and tuned  $\omega$ B97X and basis set 6-31G(d) via PCM ( $\epsilon=3.0$ ). The experimental data are from reference 1.<sup>1</sup>

Table S3. Calculated HOMO, LUMO and corresponding gap energy of BTPTT-4F and BTPT-4F



monomers and dimers obtained with functionals B3LYP, CAM-B3LYP, and tuned  $\omega$ B97X and basis set 6-31G(d) via PCM ( $\epsilon=3.0$ ).

| Functional    | System   | HOMO  | LUMO  | Gap  | System  | HOMO  | LUMO  | Gap  |
|---------------|----------|-------|-------|------|---------|-------|-------|------|
| B3LYP         | BTPTT-4F | -5.44 | -3.44 | 2.01 | BTPT-4F | -5.70 | -3.59 | 2.11 |
|               | 2BTPTT-1 | -5.44 | -3.58 | 1.86 | 2BTPT-1 | -5.69 | -3.70 | 1.99 |
|               | 2BTPTT-2 | -5.48 | -3.49 | 1.99 | 2BTPT-2 | -5.69 | -3.71 | 1.98 |
|               | 2BTPTT-3 | -5.38 | -3.51 | 1.88 | 2BTPT-3 | -5.60 | -3.71 | 1.90 |
|               | 2BTPTT-4 | -5.38 | -3.46 | 1.92 | 2BTPT-4 | -5.67 | -3.70 | 1.97 |
|               | 2BTPTT-5 | -5.44 | -3.48 | 1.96 | 2BTPT-5 | -5.68 | -3.65 | 2.03 |
|               | 2BTPTT-6 | -5.44 | -3.49 | 1.95 | 2BTPT-6 | -5.70 | -3.67 | 2.03 |
|               | 2BTPTT-7 | -5.49 | -3.55 | 1.94 | 2BTPT-7 | -5.80 | -3.75 | 2.06 |
| CAM-B3LYP     | BTPTT-4F | -6.45 | -2.56 | 3.90 | BTPT-4F | -6.71 | -2.69 | 4.02 |
|               | 2BTPTT-1 | -6.45 | -2.72 | 3.73 | 2BTPT-1 | -6.71 | -2.80 | 3.91 |
|               | 2BTPTT-2 | -6.50 | -2.60 | 3.89 | 2BTPT-2 | -6.72 | -2.81 | 3.91 |
|               | 2BTPTT-3 | -6.39 | -2.66 | 3.73 | 2BTPT-3 | -6.60 | -2.82 | 3.78 |
|               | 2BTPTT-4 | -6.38 | -2.59 | 3.79 | 2BTPT-4 | -6.69 | -2.82 | 3.86 |
|               | 2BTPTT-5 | -6.45 | -2.61 | 3.84 | 2BTPT-5 | -6.69 | -2.77 | 3.92 |
|               | 2BTPTT-6 | -6.44 | -2.60 | 3.84 | 2BTPT-6 | -6.70 | -2.79 | 3.91 |
|               | 2BTPTT-7 | -6.50 | -2.68 | 3.82 | 2BTPT-7 | -6.83 | -2.85 | 3.98 |
| $\omega$ B97X | BTPTT-4F | -5.28 | -3.01 | 2.27 | BTPT-4F | -5.52 | -3.20 | 2.32 |
|               | 2BTPTT-1 | -5.26 | -3.13 | 2.13 | 2BTPT-1 | -5.49 | -3.28 | 2.22 |
|               | 2BTPTT-2 | -5.29 | -3.04 | 2.25 | 2BTPT-2 | -5.50 | -3.29 | 2.21 |
|               | 2BTPTT-3 | -5.21 | -3.06 | 2.15 | 2BTPT-3 | -5.42 | -3.28 | 2.13 |
|               | 2BTPTT-4 | -5.20 | -3.01 | 2.19 | 2BTPT-4 | -5.47 | -3.28 | 2.19 |

|   |         |       |       |      |         |       |       |      |
|---|---------|-------|-------|------|---------|-------|-------|------|
| 4 | 2BTPTT- | -5.27 | -3.04 | 2.23 | 2BTPT-5 | -5.48 | -3.23 | 2.24 |
| 5 | 2BTPTT- | -5.28 | -3.05 | 2.23 | 2BTPT-6 | -5.49 | -3.24 | 2.25 |
| 6 | 2BTPTT- | -5.31 | -3.10 | 2.21 | 2BTPT-7 | -5.60 | -3.33 | 2.27 |
| 7 |         |       |       |      |         |       |       |      |

Table S4. Calculated HOMO, LUMO and corresponding gap energy of BTPTT-4F and BTPT-4F monomers and dimers obtained with functional B3LYP and basis sets 6-31G(d), 6-311G(d), and 6-311G(d, p) via PCM ( $\epsilon=3.0$ ).

| Basis set | System    | HOMO     | LUMO  | Gap   | System  | HOMO    | LUMO  | Gap   |
|-----------|-----------|----------|-------|-------|---------|---------|-------|-------|
| 6-31G(d)  | BTPTT-4F  | -5.44    | -3.44 | 2.01  | BTPT-4F | -5.70   | -3.59 | 2.11  |
|           | 2BTPTT-1  | -5.44    | -3.58 | 1.86  | 2BTPT-1 | -5.69   | -3.70 | 1.99  |
|           | 2BTPTT-2  | -5.48    | -3.49 | 1.99  | 2BTPT-2 | -5.69   | -3.71 | 1.98  |
|           | 2BTPTT-3  | -5.38    | -3.51 | 1.88  | 2BTPT-3 | -5.60   | -3.71 | 1.90  |
|           | 2BTPTT-4  | -5.38    | -3.46 | 1.92  | 2BTPT-4 | -5.67   | -3.70 | 1.97  |
|           | 2BTPTT-5  | -5.44    | -3.48 | 1.96  | 2BTPT-5 | -5.68   | -3.65 | 2.03  |
|           | 2BTPTT-6  | -5.44    | -3.49 | 1.95  | 2BTPT-6 | -5.70   | -3.67 | 2.03  |
|           | 2BTPTT-7  | -5.49    | -3.55 | 1.94  | 2BTPT-7 | -5.80   | -3.75 | 2.06  |
|           | Average   | -5.44    | -3.50 | 1.94  | Average | -5.69   | -3.68 | 2.01  |
|           | 6-311G(d) | BTPTT-4F | -5.66 | -3.68 | 1.98    | BTPT-4F | -5.93 | -3.83 |
| 2BTPTT-1  |           | -5.66    | -3.83 | 1.84  | 2BTPT-1 | -5.92   | -3.96 | 1.97  |
| 2BTPTT-2  |           | -5.69    | -3.73 | 1.97  | 2BTPT-2 | -5.92   | -3.95 | 1.97  |
| 2BTPTT-3  |           | -5.60    | -3.74 | 1.85  | 2BTPT-3 | -5.83   | -3.95 | 1.88  |
| 2BTPTT-4  |           | -5.59    | -3.70 | 1.89  | 2BTPT-4 | -5.90   | -3.95 | 1.95  |
| 2BTPTT-5  |           | -5.66    | -3.72 | 1.94  | 2BTPT-5 | -5.91   | -3.89 | 2.01  |
| 2BTPTT-6  |           | -5.66    | -3.73 | 1.94  | 2BTPT-6 | -5.92   | -3.91 | 2.01  |
| 2BTPTT-7  |           | -5.70    | -3.79 | 1.92  | 2BTPT-7 | -6.02   | -3.99 | 2.04  |

|              |          |       |       |      |         |       |       |      |
|--------------|----------|-------|-------|------|---------|-------|-------|------|
|              | Average  | -5.65 | -3.74 | 1.92 | Average | -5.92 | -3.93 | 1.99 |
| 6-311G(d, p) | BTPTT-4F | -5.66 | -3.68 | 1.98 | BTPT-4F | -5.92 | -3.84 | 2.09 |
|              | 2BTPTT-1 | -5.66 | -3.83 | 1.83 | 2BTPT-1 | -5.92 | -3.96 | 1.96 |
|              | 2BTPTT-2 | -5.69 | -3.73 | 1.96 | 2BTPT-2 | -5.92 | -3.95 | 1.97 |
|              | 2BTPTT-3 | -5.60 | -3.75 | 1.85 | 2BTPT-3 | -5.83 | -3.95 | 1.88 |
|              | 2BTPTT-4 | -5.59 | -3.70 | 1.89 | 2BTPT-4 | -5.90 | -3.95 | 1.95 |
|              | 2BTPTT-5 | -5.66 | -3.72 | 1.94 | 2BTPT-5 | -5.90 | -3.90 | 2.01 |
|              | 2BTPTT-6 | -5.66 | -3.73 | 1.93 | 2BTPT-6 | -5.92 | -3.91 | 2.01 |
|              | 2BTPTT-7 | -5.70 | -3.79 | 1.91 | 2BTPT-7 | -6.02 | -3.99 | 2.03 |
|              | Average  | -5.65 | -3.74 | 1.91 | Average | -5.92 | -3.93 | 1.99 |

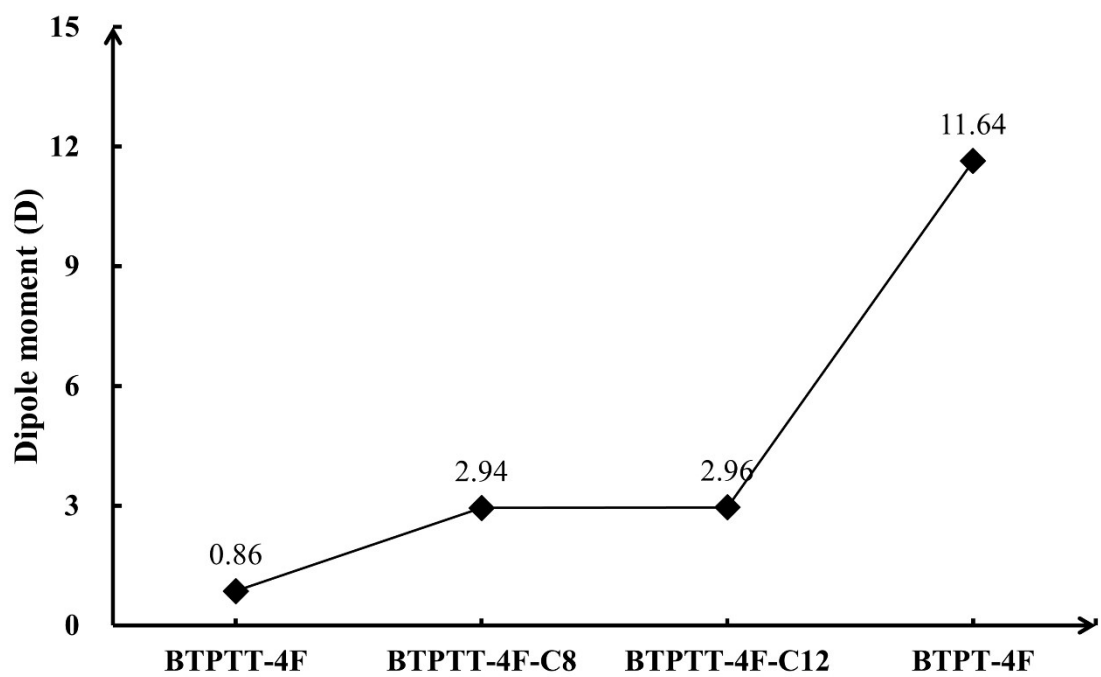

Figure S12. Dipole moments of BTPTT-4F, BTPTT-4F-C8, BTPTT-4F-C12, and BTPT-4F monomers.

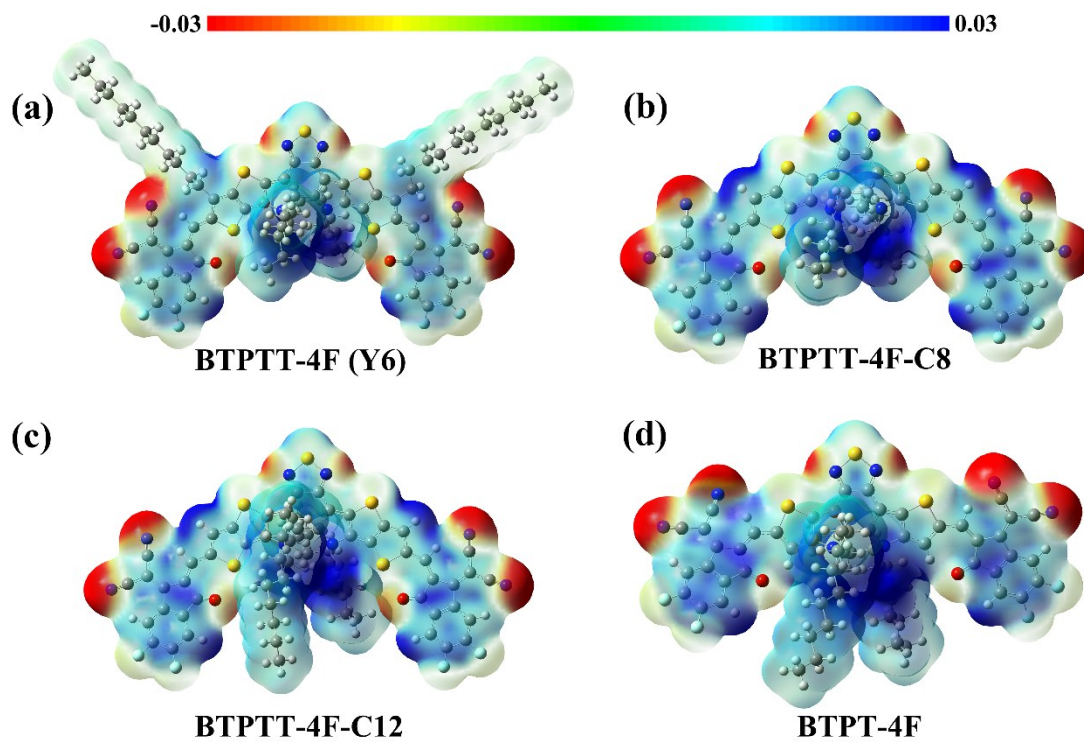

Figure S13. Molecular electrostatic potential of (a) BTPTT-4F (Y6); (b) BTPTT-4F-C8; (c) BTPTT-4F-C12; (d) BTPT-4F based on B3LYP/6-31G(d)/PCM ( $\epsilon=3.0$ ) theory level. Density=0.001 a.u. The color of code: red-negative; blue-positive; green-neutral.

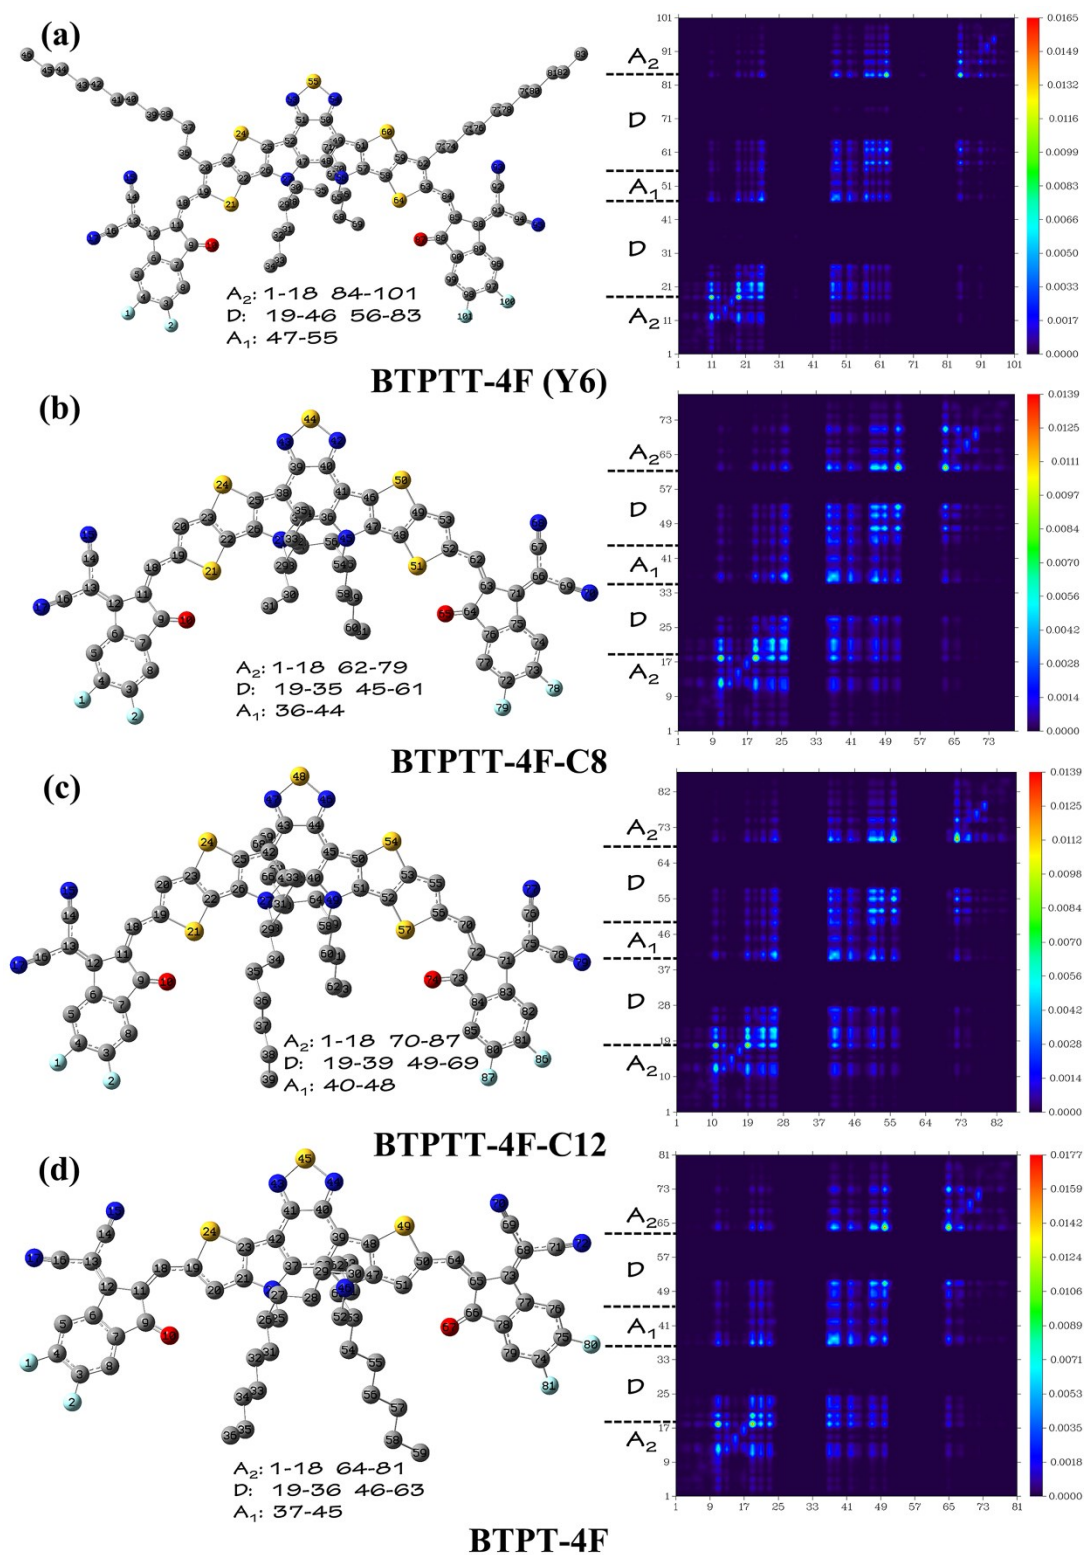

Figure S14. Excitation density matrix and the corresponding atom labels of (a) BTPTT-4F (Y6); (b) BTPTT-4F-C8; (c) BTPTT-4F-C12; (d) BTPT-4F obtained with CAM-B3LYP/6-31G(d)/PCM ( $\epsilon=3.0$ ) theory level. The abscissa and ordinate correspond to the hole and electron positions, respectively.

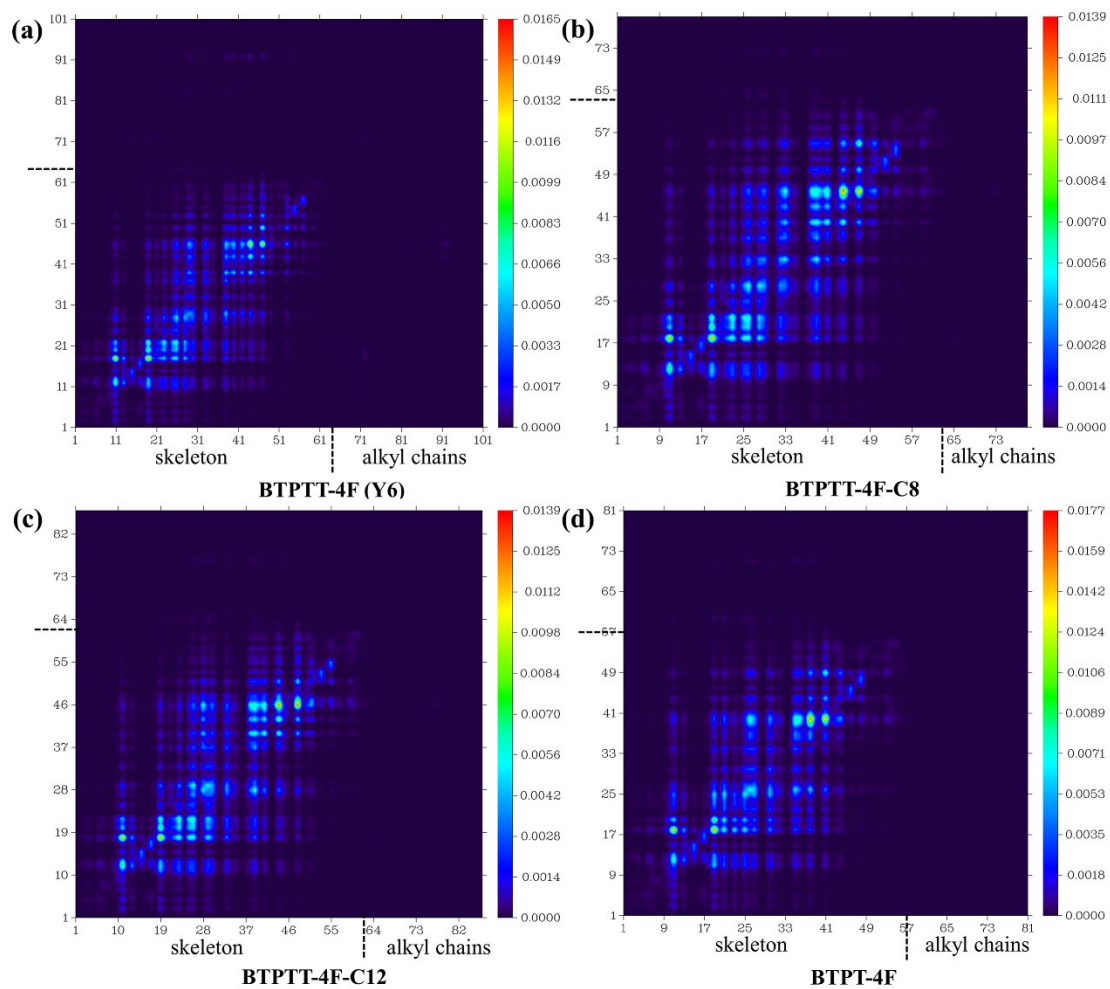

Figure S15. Excitation density matrix of (a) BTPTT-4F (Y6); (b) BTPTT-4F-C8; (c) BTPTT-4F-C12; (d) BTPT-4F obtained with CAM-B3LYP/6-31G(d)/PCM ( $\epsilon=3.0$ ) theory level. The abscissa and ordinate correspond to the hole and electron positions, respectively.

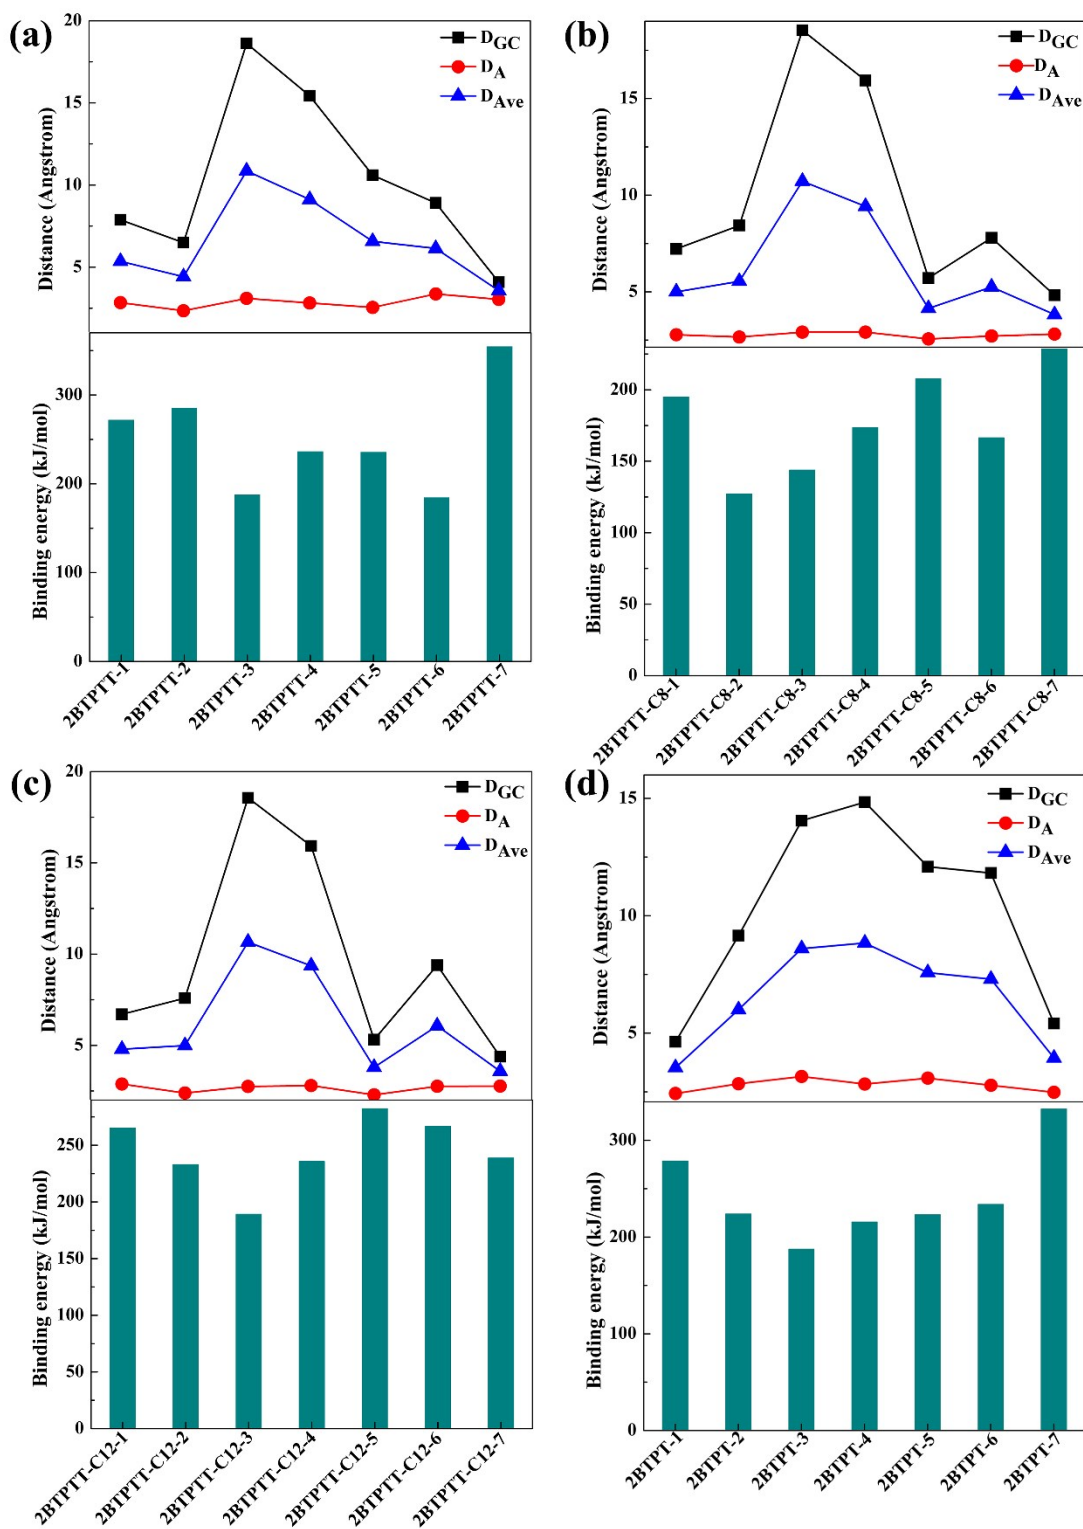

Figure S16. Binding energy and intermolecular distances  $D_{GC}$ ,  $D_A$ , and  $D_{Ave}$  of (a) BTPTT-4F; (b) BTPTT-4F-C8; (c) BTPTT-4F-C12; (d) BTPT-4F.  $D_{GC}$ : the geometry center distance of dimers;  $D_A$ : the shortest atom distance of dimers;  $D_{Ave}$ : the average distance of  $D_A$  and  $D_{GC}$ . The side alkyl side chains are omitted when measuring these distances.

Table S5. Binding energies ( $E_{binding}$ ) of BTPTT-4F, BTPTT-4F-C8, BTPTT-4F-C12, and BTPT-4F dimers obtained by B3LYP+GD3 with 6-31G (d) basis set in di-butyl ether ( $\epsilon=3.0$ ). Unit: kJ/mol

| System       | $E_{binding}$ | System      | $E_{binding}$ |
|--------------|---------------|-------------|---------------|
| 2BTPTT-1     | 271.76        | 2BTPTT-C8-1 | 194.93        |
| 2BTPTT-2     | 285.36        | 2BTPTT-C8-2 | 127.11        |
| 2BTPTT-3     | 187.60        | 2BTPTT-C8-3 | 143.84        |
| 2BTPTT-4     | 236.33        | 2BTPTT-C8-4 | 173.47        |
| 2BTPTT-5     | 235.52        | 2BTPTT-C8-5 | 207.65        |
| 2BTPTT-6     | 184.46        | 2BTPTT-C8-6 | 166.51        |
| 2BTPTT-7     | 354.38        | 2BTPTT-C8-7 | 228.57        |
| 2BTPTT-C12-1 | 265.14        | 2BTPT-1     | 278.60        |
| 2BTPTT-C12-2 | 232.98        | 2BTPT-2     | 223.84        |
| 2BTPTT-C12-3 | 189.13        | 2BTPT-3     | 187.48        |
| 2BTPTT-C12-4 | 235.60        | 2BTPT-4     | 215.57        |
| 2BTPTT-C12-5 | 282.24        | 2BTPT-5     | 223.10        |
| 2BTPTT-C12-6 | 266.55        | 2BTPT-6     | 233.80        |
| 2BTPTT-C12-7 | 238.64        | 2BTPT-7     | 332.32        |

Table S6. Distances ( $D_{GC}$ ,  $D_A$  and  $D_{Ave}$ ) of BTPTT-4F, BTPTT-4F-C8, BTPTT-4F-C12, and BTPT-4F dimers.  $D_{GC}$ : the geometry center distance of dimers;  $D_A$ : the shortest atom distance of dimers;  $D_{Ave}$ : the average distance of  $D_A$  and  $D_{GC}$ . The alkyl side chains were removed when calculating the distances. Unit: Å

| System       | $D_{GC}$ | $D_A$ | $D_{Ave}$ | System      | $D_{GC}$ | $D_A$ | $D_{Ave}$ |
|--------------|----------|-------|-----------|-------------|----------|-------|-----------|
| 2BTPTT-1     | 7.88     | 2.84  | 5.36      | 2BTPTT-C8-1 | 7.22     | 2.78  | 5.00      |
| 2BTPTT-2     | 6.49     | 2.35  | 4.42      | 2BTPTT-C8-2 | 8.43     | 2.66  | 5.54      |
| 2BTPTT-3     | 18.62    | 3.10  | 10.86     | 2BTPTT-C8-3 | 18.53    | 2.91  | 10.72     |
| 2BTPTT-4     | 15.43    | 2.82  | 9.12      | 2BTPTT-C8-4 | 15.93    | 2.91  | 9.42      |
| 2BTPTT-5     | 10.60    | 2.55  | 6.57      | 2BTPTT-C8-5 | 5.71     | 2.56  | 4.14      |
| 2BTPTT-6     | 8.91     | 3.37  | 6.14      | 2BTPTT-C8-6 | 7.79     | 2.71  | 5.25      |
| 2BTPTT-7     | 4.09     | 3.04  | 3.57      | 2BTPTT-C8-7 | 4.82     | 2.81  | 3.82      |
| 2BTPTT-C12-1 | 6.70     | 2.88  | 4.79      | 2BTPT-1     | 4.63     | 2.43  | 3.53      |
| 2BTPTT-C12-2 | 7.59     | 2.39  | 4.99      | 2BTPT-2     | 9.15     | 2.84  | 6.00      |
| 2BTPTT-C12-3 | 18.56    | 2.75  | 10.66     | 2BTPT-3     | 14.05    | 3.15  | 8.60      |
| 2BTPTT-C12-4 | 15.92    | 2.80  | 9.36      | 2BTPT-4     | 14.84    | 2.83  | 8.84      |
| 2BTPTT-C12-5 | 5.31     | 2.29  | 3.80      | 2BTPT-5     | 12.09    | 3.08  | 7.58      |
| 2BTPTT-C12-6 | 9.39     | 2.76  | 6.07      | 2BTPT-6     | 11.82    | 2.78  | 7.30      |
| 2BTPTT-C12-7 | 4.38     | 2.77  | 3.58      | 2BTPT-7     | 5.41     | 2.48  | 3.94      |

Table S7. Internal reorganization energy ( $\lambda_i$ ) of BTPTT-4F, BTPTT-4F-C8, BTPTT-4F-C12, and BTPT-4F obtained with B3LYP functional and 6-31G(d) and 6-311G(d, p) basis sets via PCM ( $\epsilon=3.0$ ). Unit: eV.

| System       | Basis set |              |
|--------------|-----------|--------------|
|              | 6-31G(d)  | 6-311G(d, p) |
| BTPTT-4F     | 0.134     | 0.131        |
| BTPTT-4F-C8  | 0.132     | 0.130        |
| BTPTT-4F-C12 | 0.132     | 0.130        |
| BTPT-4F      | 0.189     | 0.186        |



Table S8. External reorganization energy of BTPPT-4F, BTPPT-4F-C8, BTPPT-4F-C12, and BTPT-4F dimers obtained with B3LYP/6-31G(d)/PCM ( $\epsilon=3.0$ ) theory level.

| System       | $R_A/\text{\AA}$ | $r_{DA}/\text{\AA}$ | $\lambda_o/eV$ | System      | $R_A/\text{\AA}$ | $r_{DA}/\text{\AA}$ | $\lambda_o/eV$ |
|--------------|------------------|---------------------|----------------|-------------|------------------|---------------------|----------------|
| 2BTPPT-1     | 7.47             | 9.380               | 0.0652         | 2BTPPT-C8-1 | 6.67             | 8.372               | 0.0731         |
| 2BTPPT-2     | 7.47             | 9.363               | 0.0648         | 2BTPPT-C8-2 | 6.67             | 8.380               | 0.0734         |
| 2BTPPT-3     | 7.47             | 9.388               | 0.0654         | 2BTPPT-C8-3 | 6.67             | 8.376               | 0.0732         |
| 2BTPPT-4     | 7.47             | 9.384               | 0.0653         | 2BTPPT-C8-4 | 6.67             | 8.368               | 0.0729         |
| 2BTPPT-5     | 7.47             | 9.385               | 0.0654         | 2BTPPT-C8-5 | 6.67             | 8.377               | 0.0732         |
| 2BTPPT-6     | 7.47             | 9.385               | 0.0654         | 2BTPPT-C8-6 | 6.67             | 8.370               | 0.0730         |
| 2BTPPT-7     | 7.47             | 9.370               | 0.0650         | 2BTPPT-C8-7 | 6.67             | 8.366               | 0.0729         |
| 2BTPPT-C12-1 | 6.98             | 8.754               | 0.0693         | 2BTPT-1     | 6.82             | 8.553               | 0.0709         |
| 2BTPPT-C12-2 | 6.98             | 8.770               | 0.0698         | 2BTPT-2     | 6.82             | 8.570               | 0.0715         |
| 2BTPPT-C12-3 | 6.98             | 8.767               | 0.0697         | 2BTPT-3     | 6.82             | 8.555               | 0.0710         |
| 2BTPPT-C12-4 | 6.98             | 8.762               | 0.0696         | 2BTPT-4     | 6.82             | 8.561               | 0.0712         |
| 2BTPPT-C12-5 | 6.98             | 8.763               | 0.0696         | 2BTPT-5     | 6.82             | 8.565               | 0.0713         |
| 2BTPPT-C12-6 | 6.98             | 8.762               | 0.0695         | 2BTPT-6     | 6.82             | 8.561               | 0.0712         |
| 2BTPPT-C12-7 | 6.98             | 8.762               | 0.0696         | 2BTPT-7     | 6.82             | 8.541               | 0.0705         |

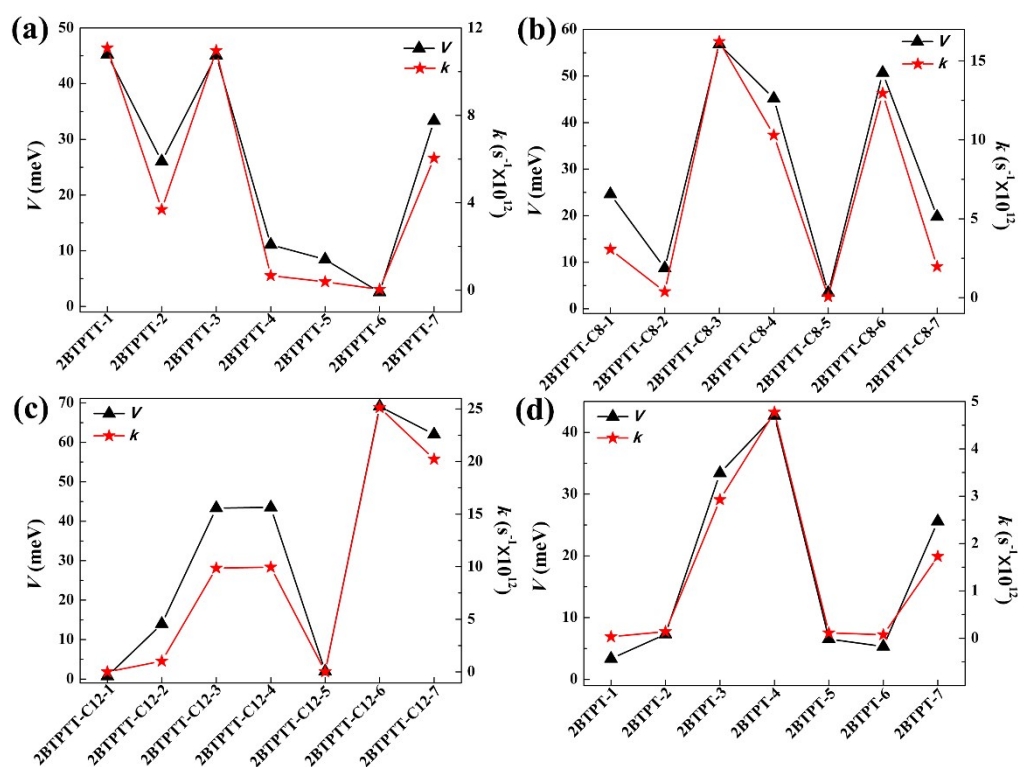

Figure S17. Absolute values of electronic coupling ( $|V|$ , in meV) and charge transfer rate constants ( $k$ , in  $s^{-1} \times 10^{12}$ ) of (a) BTPPT-4F; (b) BTPPT-4F-C8; (c) BTPPT-4F-C12; (d) BTPT-4F dimer configurations. 1-bimolecular parallel; 2-anti-parallel; 3-end-group overlap; 4-end-group anti-overlap; 5-vertical-left; 6-vertical-right; 7-tail to tail overlap.

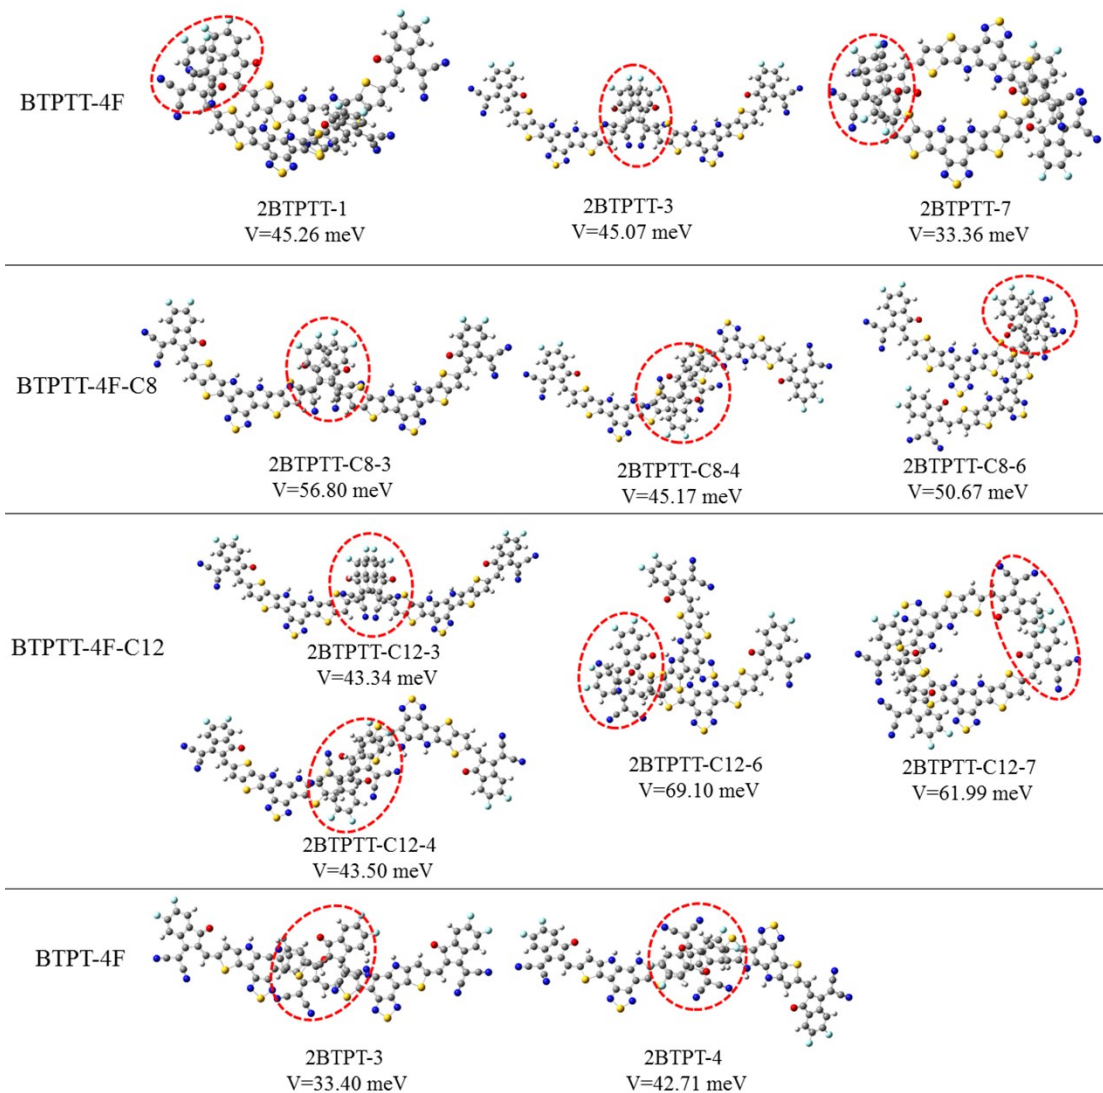

Figure S18. Dimers with high electron coupling. The end groups with face-on orientation and good stacking are circled in red. The side alkyl chains are omitted for clarity.

Table S9. Calculated geometric center distances between the end groups ( $D_{end-group}$ , in Å) and absolute values of electronic coupling ( $|V|$ , in meV) of all dimer configurations with high electron coupling.

| System       | $D_{end-group}$ | $ V $ | System      | $D_{end-group}$ | $ V $ |
|--------------|-----------------|-------|-------------|-----------------|-------|
| 2BTPTT-1     | 4.25            | 45.26 | 2BTPTT-C8-3 | 3.54            | 56.80 |
| 2BTPTT-3     | 3.61            | 45.07 | 2BTPTT-C8-4 | 5.80            | 45.17 |
| 2BTPTT-7     | 3.53            | 33.36 | 2BTPTT-C8-6 | 4.31            | 50.67 |
| 2BTPTT-C12-3 | 3.75            | 43.34 | 2BTPT-3     | 6.80            | 33.40 |
| 2BTPTT-C12-4 | 5.74            | 43.50 | 2BTPT-4     | 4.32            | 42.71 |
| 2BTPTT-C12-6 | 5.68            | 69.10 |             |                 |       |

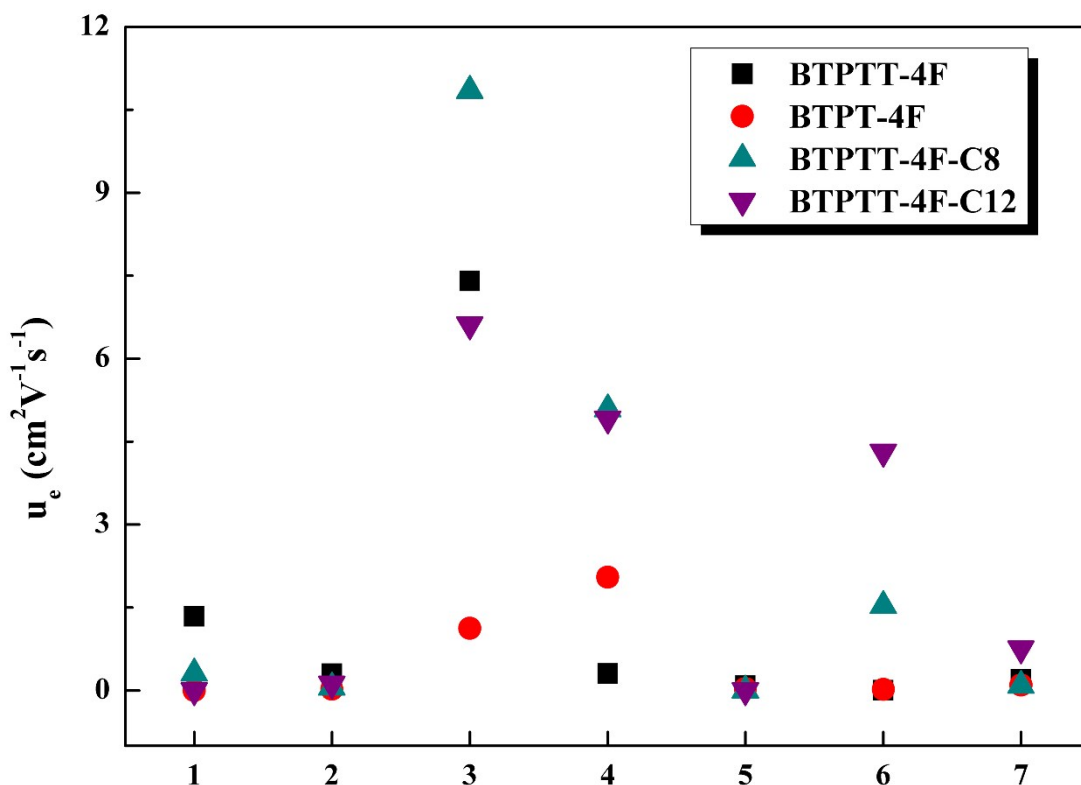

Figure S19. Charge carrier mobility ( $\mu_e$ , in  $\text{cm}^2\text{V}^{-1}\text{s}^{-1}$ ) of BTPTT-4F, BTPTT-4F-C8, BTPTT-4F-C12, and BTPT-4F dimer configurations. 1-bimolecular parallel; 2-anti-parallel; 3-end-group overlap; 4-end-group anti-overlap; 5-vertical-left; 6-vertical-right; 7-tail to tail overlap.

Table S10. Charge transfer distances ( $r$ , in  $\text{\AA}$ ), absolute values of electronic coupling ( $|V|$ , in meV), reorganization energy ( $\lambda$ , in eV), charge transfer rate constants ( $k$ , in  $\text{s}^{-1}$ ), and charge carrier mobility ( $\mu_e$ , in  $\text{cm}^2\text{V}^{-1}\text{s}^{-1}$ ) of BTPTT-4F, BTPTT-4F-C8, BTPTT-4F-C12, and BTPT-4F dimers.

| System      | $r$   | $ V $ | $\lambda$ | $k$                   | $\mu_e$               |
|-------------|-------|-------|-----------|-----------------------|-----------------------|
| 2BTPTT-1    | 7.88  | 45.26 | 0.199     | $1.11 \times 10^{13}$ | 1.34                  |
| 2BTPTT-2    | 6.49  | 26.05 | 0.199     | $3.69 \times 10^{12}$ | $3.03 \times 10^{-1}$ |
| 2BTPTT-3    | 18.62 | 45.07 | 0.199     | $1.10 \times 10^{13}$ | 7.40                  |
| 2BTPTT-4    | 15.43 | 11.09 | 0.199     | $6.64 \times 10^{11}$ | $3.08 \times 10^{-1}$ |
| 2BTPTT-5    | 10.60 | 8.43  | 0.199     | $3.84 \times 10^{11}$ | $8.40 \times 10^{-2}$ |
| 2BTPTT-6    | 8.91  | 2.55  | 0.199     | $3.52 \times 10^{10}$ | $5.43 \times 10^{-3}$ |
| 2BTPTT-7    | 4.09  | 33.36 | 0.199     | $6.04 \times 10^{12}$ | $1.97 \times 10^{-1}$ |
| 2BTPTT-C8-1 | 7.22  | 24.63 | 0.205     | $3.06 \times 10^{12}$ | $3.10 \times 10^{-1}$ |
| 2BTPTT-C8-2 | 8.43  | 8.72  | 0.205     | $3.81 \times 10^{11}$ | $5.27 \times 10^{-2}$ |

|              |       |       |       |                       |                       |
|--------------|-------|-------|-------|-----------------------|-----------------------|
| 2BTPTT-C8-3  | 18.53 | 56.80 | 0.205 | $1.62 \times 10^{13}$ | 10.84                 |
| 2BTPTT-C8-4  | 15.93 | 45.17 | 0.205 | $1.03 \times 10^{13}$ | 5.09                  |
| 2BTPTT-C8-5  | 5.71  | 3.45  | 0.205 | $6.00 \times 10^{10}$ | $3.81 \times 10^{-3}$ |
| 2BTPTT-C8-6  | 7.79  | 50.67 | 0.205 | $1.30 \times 10^{13}$ | 1.53                  |
| 2BTPTT-C8-7  | 4.82  | 19.77 | 0.205 | $1.97 \times 10^{12}$ | $8.93 \times 10^{-2}$ |
| 2BTPTT-C12-1 | 6.70  | 0.72  | 0.202 | $2.71 \times 10^9$    | $2.37 \times 10^{-4}$ |
| 2BTPTT-C12-2 | 7.59  | 13.96 | 0.202 | $1.02 \times 10^{12}$ | $1.15 \times 10^{-1}$ |
| 2BTPTT-C12-3 | 18.56 | 43.34 | 0.202 | $9.86 \times 10^{12}$ | 6.61                  |
| 2BTPTT-C12-4 | 15.92 | 43.50 | 0.202 | $9.96 \times 10^{12}$ | 4.91                  |
| 2BTPTT-C12-5 | 5.31  | 1.93  | 0.202 | $1.95 \times 10^{10}$ | $1.07 \times 10^{-3}$ |
| 2BTPTT-C12-6 | 9.39  | 69.10 | 0.202 | $2.51 \times 10^{13}$ | 4.31                  |
| 2BTPTT-C12-7 | 4.38  | 61.99 | 0.202 | $2.02 \times 10^{13}$ | $7.55 \times 10^{-1}$ |
| 2BTPT-1      | 4.63  | 3.34  | 0.260 | $2.93 \times 10^{10}$ | $1.22 \times 10^{-3}$ |
| 2BTPT-2      | 9.15  | 7.30  | 0.260 | $1.39 \times 10^{11}$ | $2.27 \times 10^{-2}$ |
| 2BTPT-3      | 14.05 | 33.40 | 0.260 | $2.93 \times 10^{12}$ | 1.12                  |
| 2BTPT-4      | 14.84 | 42.71 | 0.260 | $4.77 \times 10^{12}$ | 2.05                  |
| 2BTPT-5      | 12.09 | 6.53  | 0.260 | $1.11 \times 10^{11}$ | $3.17 \times 10^{-2}$ |
| 2BTPT-6      | 11.82 | 5.31  | 0.260 | $7.38 \times 10^{10}$ | $2.01 \times 10^{-2}$ |
| 2BTPT-7      | 5.41  | 25.59 | 0.260 | $1.73 \times 10^{12}$ | $9.82 \times 10^{-2}$ |

Table S11. Charge transfer rate constants ( $k_{M-L-J}$ , in  $s^{-1}$ ) and charge carrier mobility ( $\mu_{e,M-L-J}$ , in  $cm^2V^{-1}s^{-1}$ ) of BTPTT-4F, BTPTT-4F-C8, BTPTT-4F-C12, and BTPT-4F dimers obtained with M-L-J formula.

| System       | $k_{M-L-J}$           | $\mu_{e,M-L-J}$       | System      | $k_{M-L-J}$           | $\mu_{e,M-L-J}$       |
|--------------|-----------------------|-----------------------|-------------|-----------------------|-----------------------|
| 2BTPTT-1     | $3.53 \times 10^{13}$ | 4.26                  | 2BTPTT-C8-1 | $9.24 \times 10^{12}$ | $9.38 \times 10^{-1}$ |
| 2BTPTT-2     | $1.18 \times 10^{13}$ | $9.67 \times 10^{-1}$ | 2BTPTT-C8-2 | $1.15 \times 10^{12}$ | $1.59 \times 10^{-1}$ |
| 2BTPTT-3     | $3.49 \times 10^{13}$ | 23.54                 | 2BTPTT-C8-3 | $4.90 \times 10^{13}$ | 32.77                 |
| 2BTPTT-4     | $2.11 \times 10^{12}$ | $9.79 \times 10^{-1}$ | 2BTPTT-C8-4 | $3.12 \times 10^{13}$ | 15.39                 |
| 2BTPTT-5     | $1.22 \times 10^{12}$ | $2.67 \times 10^{-1}$ | 2BTPTT-C8-5 | $1.81 \times 10^{11}$ | $1.15 \times 10^{-2}$ |
| 2BTPTT-6     | $1.12 \times 10^{11}$ | $1.73 \times 10^{-2}$ | 2BTPTT-C8-6 | $3.92 \times 10^{13}$ | 4.62                  |
| 2BTPTT-7     | $1.93 \times 10^{13}$ | $6.28 \times 10^{-1}$ | 2BTPTT-C8-7 | $5.98 \times 10^{12}$ | $2.70 \times 10^{-1}$ |
| 2BTPTT-C12-1 | $8.35 \times 10^9$    | $7.17 \times 10^{-4}$ | 2BTPT-1     | $1.31 \times 10^{11}$ | $5.45 \times 10^{-3}$ |
| 2BTPTT-C12-2 | $3.14 \times 10^{12}$ | $3.52 \times 10^{-1}$ | 2BTPT-2     | $6.18 \times 10^{11}$ | $1.01 \times 10^{-1}$ |
| 2BTPTT-C12-3 | $3.03 \times 10^{13}$ | 20.30                 | 2BTPT-3     | $1.30 \times 10^{13}$ | 5.01                  |
| 2BTPTT-C12-4 | $3.06 \times 10^{13}$ | 15.09                 | 2BTPT-4     | $2.13 \times 10^{13}$ | 9.11                  |

|              |                       |                       |         |                       |                       |
|--------------|-----------------------|-----------------------|---------|-----------------------|-----------------------|
| 2BTPTT-C12-5 | $6.00 \times 10^{10}$ | $3.30 \times 10^{-3}$ | 2BTPT-5 | $4.95 \times 10^{11}$ | $1.41 \times 10^{-1}$ |
| 2BTPTT-C12-6 | $7.72 \times 10^{13}$ | 13.24                 | 2BTPT-6 | $3.29 \times 10^{11}$ | $8.94 \times 10^{-2}$ |
| 2BTPTT-C12-7 | $6.21 \times 10^{13}$ | 2.32                  | 2BTPT-7 | $7.71 \times 10^{12}$ | $4.38 \times 10^{-1}$ |

---

## References

1. B. Fan, D. Zhang, M. Li, W. Zhong, Z. Zeng, L. Ying, F. Huang and Y. Cao, *Sci. China Chem.*, 2019, **62**, 746-752.
